# Supplementary material for: The mitochondrial genome of Muga silkworm (Antheraea assamensis) and its comparative analysis with other lepidopteran insects
Source: PubMed Central journal article supplement (PMC5687760; doi:10.1371/journal.pone.0188077), 2017-11-15
Supplement: pone.0188077.s009.pdf [file pone.0188077.s009.pdf]

**S1 Table.** Comparative gene lengths in Bombycoids.

| Genes                      | <i>A. assamensis</i><br>(in bp) | <i>S. ricini</i><br>(in bp) | <i>A. pernyi</i><br>(in bp) | <i>A. yamamai</i><br>(in bp) | <i>B. mandarina</i><br>(in bp) | <i>B. mori</i><br>(in bp) | <i>M. sexta</i><br>(in bp) |
|----------------------------|---------------------------------|-----------------------------|-----------------------------|------------------------------|--------------------------------|---------------------------|----------------------------|
| <i>tRNA<sup>Met</sup></i>  | 68                              | 68                          | 67                          | 67                           | 68                             | 68                        | 69                         |
| <i>tRNA<sup>Ile</sup></i>  | 65                              | 65                          | 64                          | 64                           | 66                             | 66                        | 65                         |
| <i>tRNA<sup>Gln</sup></i>  | 69                              | 69                          | 69                          | 69                           | 69                             | 69                        | 69                         |
| <i>nad2</i>                | 1014                            | 1014                        | 1014                        | 1014                         | 1023                           | 1023                      | 1015                       |
| <i>tRNA<sup>Trp</sup></i>  | 68                              | 68                          | 68                          | 68                           | 70                             | 70                        | 67                         |
| <i>tRNA<sup>Cys</sup></i>  | 64                              | 62                          | 61                          | 63                           | 67                             | 67                        | 64                         |
| <i>tRNA<sup>Tyr</sup></i>  | 67                              | 65                          | 66                          | 67                           | 66                             | 66                        | 66                         |
| <i>cox1</i>                | 1531                            | 1540                        | 1531                        | 1540                         | 1531                           | 1531                      | 1531                       |
| <i>tRNA<sup>Leu2</sup></i> | 68                              | 68                          | 66                          | 67                           | 67                             | 67                        | 67                         |
| <i>cox2</i>                | 682                             | 685                         | 682                         | 682                          | 682                            | 682                       | 682                        |
| <i>tRNA<sup>Lys</sup></i>  | 71                              | 71                          | 71                          | 71                           | 71                             | 71                        | 71                         |
| <i>tRNA<sup>Asp</sup></i>  | 67                              | 68                          | 73                          | 69                           | 67                             | 67                        | 72                         |
| <i>atp8</i>                | 165                             | 165                         | 168                         | 186                          | 162                            | 162                       | 165                        |
| <i>atp6</i>                | 678                             | 678                         | 677                         | 677                          | 678                            | 678                       | 678                        |
| <i>cox3</i>                | 789                             | 789                         | 789                         | 789                          | 789                            | 789                       | 792                        |
| <i>tRNA<sup>Gly</sup></i>  | 66                              | 66                          | 66                          | 67                           | 69                             | 66                        | 66                         |
| <i>nad3</i>                | 357                             | 357                         | 354                         | 357                          | 351                            | 351                       | 354                        |
| <i>tRNA<sup>Ala</sup></i>  | 65                              | 66                          | 66                          | 66                           | 68                             | 68                        | 70                         |
| <i>tRNA<sup>Arg</sup></i>  | 65                              | 64                          | 65                          | 65                           | 64                             | 64                        | 68                         |
| <i>tRNA<sup>Asn</sup></i>  | 65                              | 65                          | 65                          | 65                           | 67                             | 65                        | 66                         |
| <i>tRNA<sup>Ser1</sup></i> | 66                              | 68                          | 66                          | 66                           | 67                             | 67                        | 66                         |
| <i>tRNA<sup>Glu</sup></i>  | 68                              | 66                          | 66                          | 66                           | 63                             | 65                        | 70                         |
| <i>tRNA<sup>Phe</sup></i>  | 66                              | 68                          | 71                          | 69                           | 67                             | 67                        | 68                         |
| <i>nad5</i>                | 1741                            | 1749                        | 1741                        | 1744                         | 1719                           | 1719                      | 1723                       |
| <i>tRNA<sup>His</sup></i>  | 65                              | 66                          | 69                          | 66                           | 69                             | 67                        | 69                         |
| <i>nad4</i>                | 1341                            | 1341                        | 1341                        | 1341                         | 1344                           | 1341                      | 1335                       |
| <i>nad4l</i>               | 291                             | 291                         | 291                         | 292                          | 291                            | 291                       | 288                        |
| <i>tRNA<sup>Thr</sup></i>  | 65                              | 65                          | 65                          | 65                           | 66                             | 65                        | 67                         |
| <i>tRNA<sup>Pro</sup></i>  | 65                              | 65                          | 65                          | 65                           | 69                             | 66                        | 65                         |
| <i>nad6</i>                | 537                             | 531                         | 537                         | 535                          | 531                            | 531                       | 531                        |
| <i>cytb</i>                | 1149                            | 1152                        | 1149                        | 1155                         | 1158                           | 1152                      | 1155                       |
| <i>tRNA<sup>Ser2</sup></i> | 66                              | 66                          | 68                          | 69                           | 66                             | 66                        | 66                         |
| <i>nad1</i>                | 933                             | 939                         | 939                         | 933                          | 945                            | 945                       | 936                        |
| <i>tRNA<sup>Leu1</sup></i> | 68                              | 68                          | 68                          | 71                           | 71                             | 70                        | 68                         |
| <i>rrnL</i>                | 1344                            | 1358                        | 1369                        | 1380                         | 1350                           | 1378                      | 1391                       |
| <i>tRNA<sup>Val</sup></i>  | 68                              | 66                          | 67                          | 68                           | 71                             | 69                        | 65                         |
| <i>rrnS</i>                | 779                             | 779                         | 775                         | 776                          | 784                            | 783                       | 775                        |
| Control region             | 328                             | 361                         | 552                         | 334                          | 484                            | 494                       | 326                        |
| Whole mito-genome          | 15,272                          | 15,384                      | 15,575                      | 15,338                       | 15,682                         | 15,656                    | 15,516                     |

|                        |               |               |               |               |               |               |               |
|------------------------|---------------|---------------|---------------|---------------|---------------|---------------|---------------|
| <b>Total<br/>PCGs</b>  | <b>11,208</b> | <b>11,231</b> | <b>11,213</b> | <b>11,245</b> | <b>11,204</b> | <b>11,195</b> | <b>11,185</b> |
| <b>Total<br/>tRNAs</b> | <b>1,465</b>  | <b>1,463</b>  | <b>1,472</b>  | <b>1,473</b>  | <b>1,488</b>  | <b>1,476</b>  | <b>1,484</b>  |
| <b>Total<br/>rRNAs</b> | <b>2,123</b>  | <b>2,137</b>  | <b>2,144</b>  | <b>2,156</b>  | <b>2,134</b>  | <b>2,161</b>  | <b>2,166</b>  |
