# Supplementary material for: The mitochondrial genome of Muga silkworm (Antheraea assamensis) and its comparative analysis with other lepidopteran insects
Source: PubMed Central journal article supplement (PMC5687760; doi:10.1371/journal.pone.0188077), 2017-11-15
Supplement: pone.0188077.s010.pdf [file pone.0188077.s010.pdf]

**S2 Table. Gene by gene divergences in the protein coding genes at different taxonomic levels, both at nucleotide level and amino acid levels. C here denotes conserved sites, I denotes phylogenetically informative sites, V denotes variable sites, N denotes nucleotide level, A denotes amino acid level. The number of sites is represented in terms of percentage values.**

| Sites      | Hierarchy level    | <i>nad2</i> | <i>cox1</i> | <i>cox2</i> | <i>atp8</i> | <i>atp6</i> | <i>cox3</i> | <i>nad3</i> | <i>nad5</i> | <i>nad4</i> | <i>nad4l</i> | <i>nad6</i> | <i>cytb</i> | <i>nad1</i> |
|------------|--------------------|-------------|-------------|-------------|-------------|-------------|-------------|-------------|-------------|-------------|--------------|-------------|-------------|-------------|
| <b>C-N</b> | <b>Species</b>     | 84.1        | 88.9        | 89.2        | 86.3        | 87.8        | 87.1        | 90.5        | 90.1        | 89.9        | 90.5         | 83.1        | 85.3        | 86.3        |
|            | <b>Genus</b>       | 78.8        | 84          | 85          | 81.5        | 82.4        | 80.6        | 80.4        | 85.9        | 85.2        | 85           | 73.3        | 78.6        | 81.6        |
|            | <b>Family</b>      | 70.7        | 78.5        | 80          | 64.3        | 73.5        | 71.5        | 70.4        | 76.9        | 76.1        | 75.9         | 61.3        | 70.4        | 71          |
|            | <b>Superfamily</b> | 66          | 76.1        | 78          | 56          | 71.3        | 68.6        | 67.9        | 72.6        | 70.8        | 73.8         | 56.1        | 66.4        | 68.1        |
|            | <b>Order</b>       | 51.2        | 68.5        | 69.2        | 41.7        | 62.5        | 60.7        | 58.4        | 59.7        | 59.7        | 58.2         | 41.9        | 58.1        | 59.5        |
| <b>V-N</b> | <b>Species</b>     | 12.7        | 10.4        | 10.4        | 13.7        | 11.9        | 12.5        | 9.22        | 9.05        | 9.81        | 8.5          | 16.3        | 13.2        | 11.5        |
|            | <b>Genus</b>       | 17.9        | 15.2        | 14.6        | 18.5        | 17.4        | 19.1        | 19.3        | 13.4        | 14.5        | 13.9         | 26.1        | 20.1        | 16.9        |
|            | <b>Family</b>      | 27.2        | 20.7        | 19.6        | 35.7        | 26.2        | 28.2        | 29.3        | 22.6        | 23.6        | 24.1         | 38.7        | 28.9        | 28.1        |
|            | <b>Superfamily</b> | 31.9        | 23.1        | 21.6        | 44          | 28.4        | 31.1        | 31.8        | 27.1        | 28.9        | 26.2         | 43.9        | 32.8        | 30.9        |
|            | <b>Order</b>       | 46.8        | 30.9        | 30.8        | 58.3        | 37.2        | 38.9        | 41.3        | 40          | 40          | 41.8         | 58.1        | 41.1        | 39.5        |
| <b>I-N</b> | <b>Species</b>     | 0           | 0           | 0           | 0           | 0           | 0           | 0           | 0           | 0           | 0            | 0           | 0           | 0           |
|            | <b>Genus</b>       | 3.34        | 2.72        | 3.21        | 2.38        | 3.82        | 2.65        | 1.68        | 2.56        | 2.75        | 2.04         | 3.89        | 3.08        | 3.77        |
|            | <b>Family</b>      | 18.4        | 12.2        | 12.3        | 24.4        | 18.8        | 16.7        | 18.2        | 14.9        | 14.9        | 12.9         | 24.3        | 16.1        | 18.3        |
|            | <b>Superfamily</b> | 20          | 14.2        | 13.3        | 28.6        | 20          | 18.6        | 19.6        | 16.5        | 16.1        | 15.3         | 27.4        | 18.2        | 19.4        |
|            | <b>Order</b>       | 22          | 15.9        | 15.8        | 33.3        | 22.5        | 21.7        | 23.5        | 18.5        | 19.3        | 19           | 32          | 21.5        | 21.5        |
| <b>C-A</b> | <b>Species</b>     | 86          | 98.2        | 96.9        | 76.8        | 94.2        | 93.9        | 90.8        | 91.8        | 91.3        | 87.8         | 83.3        | 92.5        | 91.8        |
|            | <b>Genus</b>       | 81.1        | 97.9        | 94.3        | 69.6        | 92          | 90.9        | 80.7        | 88.5        | 87.5        | 81.6         | 74.4        | 88.4        | 86.2        |
|            | <b>Family</b>      | 66.5        | 91.1        | 89          | 42.9        | 78.3        | 80.3        | 68.9        | 75.2        | 72.5        | 67.3         | 55.6        | 78.4        | 67          |
|            | <b>Superfamily</b> | 61          | 90.1        | 86.8        | 39.3        | 76.1        | 77.3        | 64.7        | 69.4        | 67          | 64.3         | 52.2        | 74.8        | 63.2        |
|            | <b>Order</b>       | 40.1        | 79.8        | 71.9        | 25          | 61.5        | 67.8        | 53.8        | 53.7        | 52.7        | 46.9         | 31.7        | 62          | 51.6        |
| <b>V-A</b> | <b>Species</b>     | 10.6        | 1           | 2.63        | 21.4        | 5.31        | 5.3         | 8.4         | 7.4         | 8.26        | 10.2         | 15.6        | 5.66        | 5.7         |
|            | <b>Genus</b>       | 15.5        | 1.4         | 5.26        | 28.6        | 7.52        | 8.33        | 18.5        | 10.8        | 12.1        | 16.3         | 24.4        | 10          | 11.9        |
|            | <b>Family</b>      | 31.2        | 8.2         | 10.5        | 55.4        | 21.2        | 18.9        | 30.3        | 24.1        | 27          | 31.6         | 43.9        | 20.6        | 31.8        |
|            | <b>Superfamily</b> | 36.7        | 9.1         | 12.7        | 58.9        | 23.5        | 22          | 34.5        | 30.1        | 32.6        | 34.7         | 47.2        | 24.2        | 35.5        |
|            | <b>Order</b>       | 57.9        | 19.6        | 28.1        | 73.2        | 38.1        | 31.4        | 45.4        | 45.8        | 46.9        | 52           | 67.8        | 37          | 47.2        |
| <b>I-A</b> | <b>Species</b>     | 0           | 0           | 0           | 0           | 0           | 0           | 0           | 0           | 0           | 0            | 0           | 0           | 0           |
|            | <b>Genus</b>       | 2.9         | 0.2         | 1.32        | 1.79        | 2.65        | 1.14        | 0.84        | 2.6         | 2.01        | 1.02         | 1.7         | 1.8         | 1.3         |
|            | <b>Family</b>      | 24.4        | 6           | 6.14        | 37.5        | 18.6        | 13.6        | 22.7        | 19.8        | 19          | 20.4         | 33.3        | 11.6        | 20.4        |
|            | <b>Superfamily</b> | 25.5        | 6.2         | 6.58        | 37.5        | 19          | 15.5        | 23.5        | 20.5        | 19.6        | 22.4         | 35          | 12.6        | 21.7        |
|            | <b>Order</b>       | 27.5        | 6.4         | 8.3         | 44.6        | 20.4        | 16.3        | 26.1        | 21.5        | 22.5        | 25.5         | 38.9        | 13.4        | 23.9        |
